# Supplementary material
Source: PubMed Central journal article supplement (PMC6641173)
Supplement: ao6b00472_si_001.pdf [file ao6b00472_si_001.pdf]

# SUPPORTING INFORMATION TO

## Substrate Grain-Dependent Chemistry of Carburized Planar Anodic TiO<sub>2</sub> on Polycrystalline Ti

*Celine Rüdiger<sup>a\*</sup>, Marco Favaro<sup>b†</sup>, Carlos Valero-Vidal<sup>c‡</sup>, Laura Calvillo<sup>b</sup>, Nathalie Bozzolo<sup>d</sup>, Suzanne Jacomet<sup>d</sup>, Jennifer Hein<sup>e#</sup>, Luca Gregoratti<sup>f</sup>, Stefano Agnoli<sup>b</sup>, Gaetano Granozzi<sup>b</sup>, Julia Kunze-Liebhäuser<sup>c\*</sup>*

<sup>a</sup> Physik-Department, Technische Universität München, James-Franck-Str. 1, 85748 Garching, Germany.

<sup>b</sup> Dipartimento di Scienze Chimiche, Università di Padova, Via Marzolo 1, 35131 Padova, Italy.

<sup>c</sup> Institut für Physikalische Chemie, Leopold-Franzens-Universität Innsbruck, Innrain 52c, 6020 Innsbruck, Austria.

<sup>d</sup> MINES ParisTech, PSL - Research University, CEMEF - Centre de Mise en Forme des Matériaux, CNRS UMR 7635, CS 10207 Rue Claude Daunesse 06904 Sophia Antipolis Cedex, France.

<sup>e</sup> Lehrstuhl für Technische Chemie II, Technische Universität München, Lichtenbergstr. 4, 85748 Garching, Germany.

<sup>f</sup> Elettra – Sincrotrone Trieste SCpA, SS14-Km163.5 in Area Science Park, 34149 Trieste, Italy.

\*Corresponding authors: [celine.ruediger@tum.de](mailto:celine.ruediger@tum.de), [Julia.Kunze@uibk.ac.at](mailto:Julia.Kunze@uibk.ac.at)

### Present Addresses

<sup>†</sup> Helmholtz-Zentrum Berlin (HZB), Institute for Solar Fuels, Hahn-Meitner-Platz 1, 14109 Berlin, Germany.

<sup>‡</sup> Advanced Light Source (ALS) and Joint Center for Energy Storage Research (JCESR), Lawrence Berkeley National Laboratory, 1 Cyclotron Rd., Berkeley, CA 94720, USA.

<sup>#</sup> Shell Global Solutions International B.V., PO Box 38000, 1030 BN Amsterdam, The Netherlands.

## Additional information on SPEM

The Ti  $2p_{3/2}$  chemical maps of TiOC<sub>650</sub>, TiOC<sub>750</sub> and TiOC<sub>850</sub>, (TiC/TiO<sub>2</sub> or TiO<sub>x</sub>/TiO<sub>2</sub>) were generated by dividing the integrated map obtained in the energy range 456 - 452.15 eV by the integrated map obtained in the energy range 459.85 - 456 eV. The Ti  $2p_{3/2}$  chemical maps of TiOC<sub>550</sub> (TiO<sub>2</sub>/BG) were generated by dividing the integrated map obtained in the energy range 459.85 - 456 eV by the integrated map obtained in the energy range 456 - 452.15 eV. The C  $1s$  chemical maps of all TiOC (C/BG) were generated by dividing the integrated map obtained in the energy range 286.85 - 283 eV by the integrated map obtained in the energy range 283 - 279.15 eV.

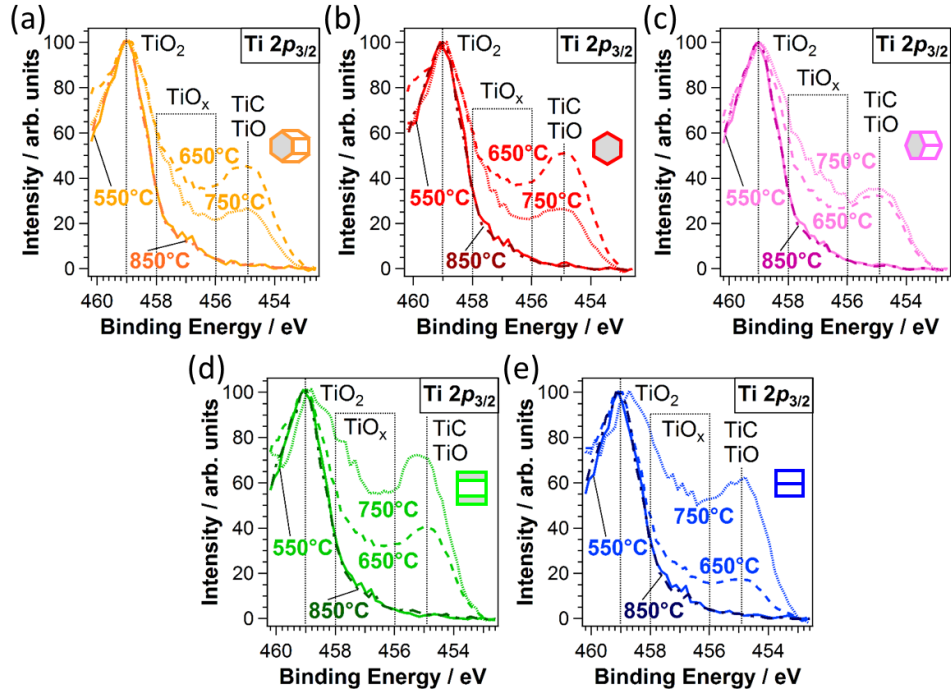

**Figure S1.** XPS spectra from Ti  $2p_{3/2}$  photoelectron micrographs taken of TiOC on top of five differently oriented substrate grains for the four annealing temperatures. The substrate orientations are (a)  $15^\circ \leq \Phi \leq 40^\circ$ ,  $0^\circ \leq \varphi_2 \leq 30^\circ$ , (b)  $0^\circ \leq \Phi \leq 15^\circ$ ,  $0^\circ \leq \varphi_2 \leq 30^\circ$  (c)  $40^\circ \leq \Phi \leq 50^\circ$ ,  $0^\circ \leq \varphi_2 \leq 30^\circ$ , (d)  $50^\circ \leq \Phi \leq 90^\circ$ ,  $15^\circ \leq \varphi_2 \leq 30^\circ$  (e)  $50^\circ \leq \Phi \leq 90^\circ$ ,  $0^\circ \leq \varphi_2 \leq 15^\circ$ .

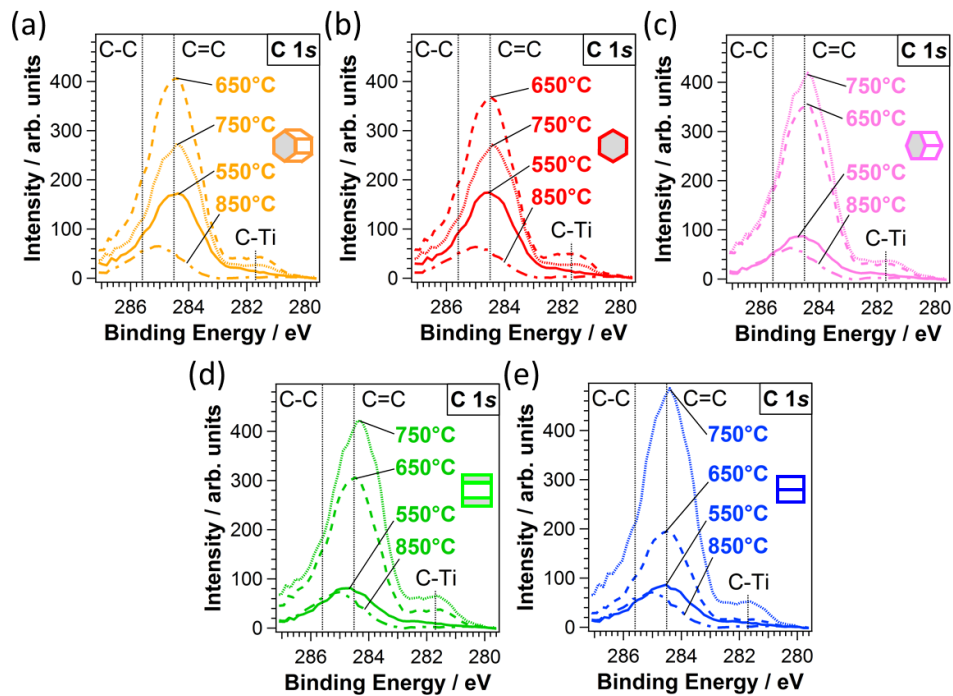

**Figure S2.** XPS spectra from C 1s photoelectron micrographs taken of TiOC on top of five differently oriented substrate grains for the four annealing temperatures. The substrate orientations are (a)  $15^\circ \leq \Phi \leq 40^\circ$ ,  $0^\circ \leq \varphi_2 \leq 30^\circ$ , (b)  $0^\circ \leq \Phi \leq 15^\circ$ ,  $0^\circ \leq \varphi_2 \leq 30^\circ$  (c)  $40^\circ \leq \Phi \leq 50^\circ$ ,  $0^\circ \leq \varphi_2 \leq 30^\circ$ , (d)  $50^\circ \leq \Phi \leq 90^\circ$ ,  $15^\circ \leq \varphi_2 \leq 30^\circ$  (e)  $50^\circ \leq \Phi \leq 90^\circ$ ,  $0^\circ \leq \varphi_2 \leq 15^\circ$ .

### Additional information on micro-Raman spectroscopy

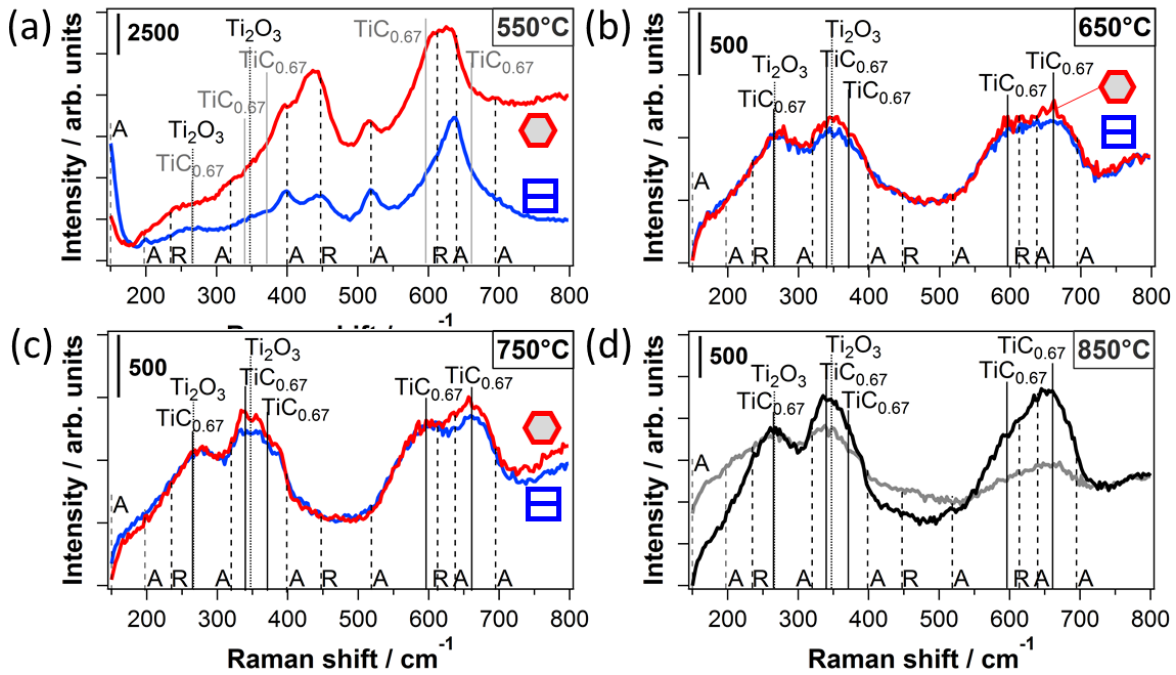

**Figure S3.** Micro-Raman spectra of (a) TiOC<sub>550</sub>, (b) TiOC<sub>650</sub> and (c) TiOC<sub>750</sub> on top of  $\sim\text{Ti}\{10\bar{1}0\}$  and  $\sim\text{Ti}(0001)$ . (d) Micro-Raman spectra of two spots on TiOC<sub>850</sub> with different optical appearance. Baseline correction: constant shift to a common level.
